# Supplementary material
Source: PubMed Central journal article supplement (PMC9106807)
Supplement: NIHMS1760573-supplement-Supplementary_Table_3.pdf [file NIHMS1760573-supplement-Supplementary_Table_3.pdf]

Supplementary Table 3 Estimates from adjusted logistic regression models including year of birth as covariate.

| Immune family                    | Immune molecule | MMG <sup>1</sup> Female |              |               |              |                    | MMG <sup>1</sup> Male |              |              |              |                    | CB <sup>2</sup> Female |              |              |              |                    | CB <sup>2</sup> Male |              |              |              |                    |
|----------------------------------|-----------------|-------------------------|--------------|---------------|--------------|--------------------|-----------------------|--------------|--------------|--------------|--------------------|------------------------|--------------|--------------|--------------|--------------------|----------------------|--------------|--------------|--------------|--------------------|
|                                  |                 | aOR                     | 95% CI       |               | p-value      | Adj p <sup>3</sup> | aOR                   | 95% CI       |              | p-value      | Adj p <sup>3</sup> | aOR                    | 95% CI       |              | p-value      | Adj p <sup>3</sup> | aOR                  | 95% CI       |              | p-value      | Adj p <sup>3</sup> |
| Adipose-derived hormones         | Leptin          | 1.122                   | 0.785        | 1.604         | 0.527        | 0.565              | 1.005                 | 0.854        | 1.183        | 0.950        | 0.951              | 0.880                  | 0.586        | 1.321        | 0.536        | 0.707              | 0.913                | 0.776        | 1.074        | 0.270        | 0.377              |
|                                  | Resistin        | 1.010                   | 0.668        | 1.527         | 0.962        | 0.962              | 1.176                 | 1.006        | 1.374        | 0.042        | 0.063              | 0.944                  | 0.622        | 1.432        | 0.786        | 0.876              | 0.949                | 0.818        | 1.102        | 0.495        | 0.618              |
| CC chemokines                    | CCL11 (eotaxin) | <b>1.967</b>            | <b>1.292</b> | <b>2.995</b>  | <b>0.002</b> | <b>0.003</b>       | 1.262                 | 1.070        | 1.488        | 0.006        | 0.009              | 1.008                  | 0.660        | 1.539        | 0.970        | 0.990              | 0.992                | 0.845        | 1.164        | 0.919        | 0.954              |
|                                  | CCL2 (MCP1)     | <b>0.190</b>            | <b>0.102</b> | <b>0.353</b>  | <b>0.000</b> | <b>0.000</b>       | <b>0.457</b>          | <b>0.381</b> | <b>0.547</b> | <b>0.000</b> | <b>0.000</b>       | 0.834                  | 0.591        | 1.178        | 0.303        | 0.504              | 0.787                | 0.674        | 0.920        | 0.003        | 0.007              |
|                                  | CCL3 (MIP1a)    | <b>3.149</b>            | <b>1.903</b> | <b>5.209</b>  | <b>0.000</b> | <b>0.000</b>       | 1.296                 | 1.097        | 1.529        | 0.002        | 0.005              | 0.957                  | 0.641        | 1.428        | 0.828        | 0.887              | 1.025                | 0.896        | 1.172        | 0.720        | 0.816              |
|                                  | CCL4 (MIP1b)    | <b>2.904</b>            | <b>1.817</b> | <b>4.640</b>  | <b>0.000</b> | <b>0.000</b>       | 1.308                 | 1.107        | 1.544        | 0.002        | 0.004              | 1.241                  | 0.789        | 1.952        | 0.351        | 0.526              | 1.024                | 0.879        | 1.192        | 0.763        | 0.833              |
|                                  | CCL5 (RANTES)   | <b>2.592</b>            | <b>1.672</b> | <b>4.019</b>  | <b>0.000</b> | <b>0.000</b>       | <b>1.697</b>          | <b>1.435</b> | <b>2.006</b> | <b>0.000</b> | <b>0.000</b>       | <b>2.712</b>           | <b>1.720</b> | <b>4.276</b> | <b>0.000</b> | <b>0.000</b>       | 1.331                | 1.142        | 1.551        | 0.000        | 0.001              |
| Cell adhesion molecules          | CCL7 (MCP3)     | <b>2.008</b>            | <b>1.188</b> | <b>3.394</b>  | <b>0.009</b> | <b>0.014</b>       | 1.051                 | 0.900        | 1.227        | 0.528        | 0.587              | <b>0.539</b>           | <b>0.345</b> | <b>0.842</b> | <b>0.007</b> | <b>0.020</b>       | 0.723                | 0.611        | 0.856        | 0.000        | 0.001              |
|                                  | sICAM1 (CD54)   | 1.607                   | 0.952        | 2.711         | 0.076        | 0.099              | 1.139                 | 0.968        | 1.340        | 0.117        | 0.160              | <b>0.229</b>           | <b>0.132</b> | <b>0.396</b> | <b>0.000</b> | <b>0.000</b>       | <b>0.411</b>         | <b>0.337</b> | <b>0.501</b> | <b>0.000</b> | <b>0.000</b>       |
| CXC chemokines                   | VCAM1 (CD106)   | <b>6.908</b>            | <b>3.486</b> | <b>13.690</b> | <b>0.000</b> | <b>0.000</b>       | <b>2.443</b>          | <b>2.022</b> | <b>2.953</b> | <b>0.000</b> | <b>0.000</b>       | <b>0.363</b>           | <b>0.209</b> | <b>0.631</b> | <b>0.000</b> | <b>0.001</b>       | <b>0.535</b>         | <b>0.447</b> | <b>0.640</b> | <b>0.000</b> | <b>0.000</b>       |
|                                  | CXCL1 (GROa)    | 1.259                   | 0.821        | 1.931         | 0.291        | 0.317              | 0.696                 | 0.584        | 0.830        | 0.000        | 0.000              | 1.396                  | 0.912        | 2.137        | 0.124        | 0.226              | 1.142                | 0.988        | 1.320        | 0.072        | 0.124              |
|                                  | CXCL10 (IP10)   | <b>3.881</b>            | <b>2.204</b> | <b>6.832</b>  | <b>0.000</b> | <b>0.000</b>       | <b>1.570</b>          | <b>1.317</b> | <b>1.873</b> | <b>0.000</b> | <b>0.000</b>       | 0.627                  | 0.396        | 0.992        | 0.046        | 0.103              | 0.942                | 0.813        | 1.091        | 0.423        | 0.564              |
|                                  | CXCL12a (SDF1)  | <b>2.786</b>            | <b>1.732</b> | <b>4.480</b>  | <b>0.000</b> | <b>0.000</b>       | 1.282                 | 1.091        | 1.507        | 0.003        | 0.005              | <b>2.508</b>           | <b>1.518</b> | <b>4.142</b> | <b>0.000</b> | <b>0.001</b>       | 1.203                | 1.021        | 1.416        | 0.027        | 0.047              |
|                                  | CXCL8 (IL8)     | <b>3.653</b>            | <b>2.078</b> | <b>6.423</b>  | <b>0.000</b> | <b>0.000</b>       | 1.485                 | 1.230        | 1.794        | 0.000        | 0.000              | 0.878                  | 0.599        | 1.289        | 0.507        | 0.692              | 0.885                | 0.759        | 1.031        | 0.116        | 0.179              |
| IL1 superfamily                  | CXCL9 (MIG)     | 1.538                   | 0.997        | 2.372         | 0.051        | 0.069              | 1.109                 | 0.948        | 1.298        | 0.197        | 0.251              | 1.174                  | 0.749        | 1.841        | 0.484        | 0.675              | 0.949                | 0.807        | 1.115        | 0.523        | 0.630              |
|                                  | IL18            | 1.350                   | 0.952        | 1.915         | 0.092        | 0.118              | 1.176                 | 1.002        | 1.381        | 0.047        | 0.069              | 0.806                  | 0.527        | 1.233        | 0.320        | 0.519              | 0.778                | 0.659        | 0.919        | 0.003        | 0.008              |
|                                  | IL1a            | <b>2.288</b>            | <b>1.450</b> | <b>3.609</b>  | <b>0.000</b> | <b>0.001</b>       | 1.267                 | 1.074        | 1.494        | 0.005        | 0.009              | 1.555                  | 1.044        | 2.316        | 0.030        | 0.069              | <b>1.552</b>         | <b>1.303</b> | <b>1.850</b> | <b>0.000</b> | <b>0.000</b>       |
|                                  | IL1b            | <b>5.754</b>            | <b>3.010</b> | <b>11.000</b> | <b>0.000</b> | <b>0.000</b>       | 1.487                 | 1.259        | 1.756        | 0.000        | 0.000              | <b>2.062</b>           | <b>1.218</b> | <b>3.492</b> | <b>0.007</b> | <b>0.020</b>       | 1.161                | 0.981        | 1.374        | 0.082        | 0.134              |
|                                  | IL1RA           | <b>6.171</b>            | <b>3.265</b> | <b>11.661</b> | <b>0.000</b> | <b>0.000</b>       | <b>2.176</b>          | <b>1.766</b> | <b>2.680</b> | <b>0.000</b> | <b>0.000</b>       | 1.239                  | 0.790        | 1.945        | 0.351        | 0.526              | 0.947                | 0.817        | 1.097        | 0.466        | 0.607              |
| IL12 family                      | IL12p40         | <b>0.352</b>            | <b>0.229</b> | <b>0.542</b>  | <b>0.000</b> | <b>0.000</b>       | <b>0.573</b>          | <b>0.486</b> | <b>0.675</b> | <b>0.000</b> | <b>0.000</b>       | 0.826                  | 0.522        | 1.305        | 0.412        | 0.604              | 0.820                | 0.694        | 0.969        | 0.020        | 0.036              |
|                                  | IL12p70         | 1.414                   | 0.876        | 2.281         | 0.156        | 0.187              | 0.846                 | 0.712        | 1.006        | 0.059        | 0.082              | 0.808                  | 0.524        | 1.247        | 0.336        | 0.526              | 0.746                | 0.625        | 0.890        | 0.001        | 0.003              |
|                                  | IL23            | 1.064                   | 0.670        | 1.689         | 0.793        | 0.806              | 0.785                 | 0.662        | 0.932        | 0.006        | 0.009              | <b>0.339</b>           | <b>0.202</b> | <b>0.569</b> | <b>0.000</b> | <b>0.000</b>       | <b>0.445</b>         | <b>0.365</b> | <b>0.543</b> | <b>0.000</b> | <b>0.000</b>       |
|                                  | IL27            | <b>2.691</b>            | <b>1.564</b> | <b>4.629</b>  | <b>0.000</b> | <b>0.001</b>       | 1.317                 | 1.109        | 1.563        | 0.002        | 0.004              | 0.997                  | 0.650        | 1.530        | 0.990        | 0.990              | 0.884                | 0.762        | 1.026        | 0.104        | 0.164              |
| IL17 family                      | IL17A           | 1.123                   | 0.727        | 1.734         | 0.602        | 0.634              | 0.781                 | 0.662        | 0.920        | 0.003        | 0.006              | 0.724                  | 0.487        | 1.076        | 0.110        | 0.210              | 0.805                | 0.691        | 0.937        | 0.005        | 0.011              |
|                                  | IL17F           | 1.325                   | 0.890        | 1.972         | 0.166        | 0.193              | 0.995                 | 0.845        | 1.172        | 0.951        | 0.951              | <b>0.442</b>           | <b>0.268</b> | <b>0.729</b> | <b>0.001</b> | <b>0.005</b>       | <b>0.538</b>         | <b>0.444</b> | <b>0.651</b> | <b>0.000</b> | <b>0.000</b>       |
|                                  | IL22            | <b>0.435</b>            | <b>0.270</b> | <b>0.700</b>  | <b>0.001</b> | <b>0.001</b>       | <b>0.448</b>          | <b>0.361</b> | <b>0.555</b> | <b>0.000</b> | <b>0.000</b>       | <b>2.197</b>           | <b>1.437</b> | <b>3.359</b> | <b>0.000</b> | <b>0.001</b>       | 1.198                | 1.032        | 1.390        | 0.018        | 0.033              |
| IL2 family                       | IL15            | 1.358                   | 0.879        | 2.097         | 0.167        | 0.193              | 0.841                 | 0.713        | 0.992        | 0.040        | 0.061              | <b>0.528</b>           | <b>0.319</b> | <b>0.874</b> | <b>0.013</b> | <b>0.034</b>       | 0.675                | 0.563        | 0.808        | 0.000        | 0.000              |
|                                  | IL2             | <b>4.747</b>            | <b>2.716</b> | <b>8.297</b>  | <b>0.000</b> | <b>0.000</b>       | <b>1.729</b>          | <b>1.459</b> | <b>2.050</b> | <b>0.000</b> | <b>0.000</b>       | <b>0.375</b>           | <b>0.232</b> | <b>0.605</b> | <b>0.000</b> | <b>0.000</b>       | <b>0.564</b>         | <b>0.468</b> | <b>0.679</b> | <b>0.000</b> | <b>0.000</b>       |
|                                  | IL21            | <b>1.555</b>            | <b>1.045</b> | <b>2.314</b>  | <b>0.030</b> | <b>0.040</b>       | 0.947                 | 0.805        | 1.115        | 0.512        | 0.580              | <b>0.368</b>           | <b>0.213</b> | <b>0.637</b> | <b>0.000</b> | <b>0.001</b>       | <b>0.611</b>         | <b>0.510</b> | <b>0.733</b> | <b>0.000</b> | <b>0.000</b>       |
|                                  | IL4             | <b>0.566</b>            | <b>0.359</b> | <b>0.893</b>  | <b>0.014</b> | <b>0.021</b>       | <b>0.609</b>          | <b>0.512</b> | <b>0.724</b> | <b>0.000</b> | <b>0.000</b>       | 1.684                  | 1.058        | 2.680        | 0.028        | 0.067              | 0.958                | 0.820        | 1.118        | 0.587        | 0.677              |
|                                  | IL7             | <b>5.319</b>            | <b>2.720</b> | <b>10.402</b> | <b>0.000</b> | <b>0.000</b>       | 1.364                 | 1.157        | 1.608        | 0.000        | 0.001              | 1.151                  | 0.733        | 1.807        | 0.542        | 0.707              | 1.005                | 0.861        | 1.172        | 0.954        | 0.954              |
|                                  | IL9             | <b>3.055</b>            | <b>1.815</b> | <b>5.142</b>  | <b>0.000</b> | <b>0.000</b>       | 1.377                 | 1.153        | 1.643        | 0.000        | 0.001              | 1.005                  | 0.636        | 1.587        | 0.985        | 0.990              | 1.082                | 0.935        | 1.252        | 0.291        | 0.397              |
| IL6 (gp130) cytokine family      | IL31            | <b>2.687</b>            | <b>1.618</b> | <b>4.464</b>  | <b>0.000</b> | <b>0.000</b>       | 1.096                 | 0.928        | 1.295        | 0.278        | 0.341              | <b>2.028</b>           | <b>1.246</b> | <b>3.300</b> | <b>0.004</b> | <b>0.014</b>       | 1.232                | 1.039        | 1.460        | 0.016        | 0.032              |
|                                  | IL6             | 1.311                   | 0.879        | 1.955         | 0.184        | 0.208              | 0.983                 | 0.837        | 1.154        | 0.830        | 0.859              | 1.475                  | 0.930        | 2.339        | 0.099        | 0.197              | 1.214                | 1.048        | 1.408        | 0.010        | 0.020              |
|                                  | LIF             | 1.444                   | 0.912        | 2.287         | 0.117        | 0.146              | 0.848                 | 0.720        | 0.999        | 0.049        | 0.070              | <b>0.469</b>           | <b>0.294</b> | <b>0.750</b> | <b>0.002</b> | <b>0.005</b>       | 0.667                | 0.558        | 0.797        | 0.000        | 0.000              |
| Neurotrophic/stimulating factors | BDNF            | <b>1.898</b>            | <b>1.239</b> | <b>2.907</b>  | <b>0.003</b> | <b>0.005</b>       | 1.022                 | 0.871        | 1.198        | 0.793        | 0.835              | <b>0.261</b>           | <b>0.148</b> | <b>0.461</b> | <b>0.000</b> | <b>0.000</b>       | <b>0.498</b>         | <b>0.411</b> | <b>0.602</b> | <b>0.000</b> | <b>0.000</b>       |
|                                  | CSF1 (M-CSF)    | <b>0.167</b>            | <b>0.088</b> | <b>0.315</b>  | <b>0.000</b> | <b>0.000</b>       | <b>0.451</b>          | <b>0.375</b> | <b>0.543</b> | <b>0.000</b> | <b>0.000</b>       | 1.096                  | 0.767        | 1.566        | 0.614        | 0.784              | 0.914                | 0.784        | 1.066        | 0.253        | 0.361              |
|                                  | CSF2 (GM-CSF)   | <b>0.290</b>            | <b>0.175</b> | <b>0.480</b>  | <b>0.000</b> | <b>0.000</b>       | <b>0.534</b>          | <b>0.447</b> | <b>0.638</b> | <b>0.000</b> | <b>0.000</b>       | 1.594                  | 0.995        | 2.554        | 0.053        | 0.113              | 0.951                | 0.810        | 1.116        | 0.538        | 0.633              |
|                                  | CSF3 (G-CSF)    | <b>8.753</b>            | <b>3.965</b> | <b>19.326</b> | <b>0.000</b> | <b>0.000</b>       | <b>1.819</b>          | <b>1.526</b> | <b>2.169</b> | <b>0.000</b> | <b>0.000</b>       | 0.851                  | 0.570        | 1.268        | 0.427        | 0.610              | 0.891                | 0.759        | 1.047        | 0.161        | 0.236              |
| Other growth factors             | SCF (KITLG)     | <b>4.087</b>            | <b>2.273</b> | <b>7.349</b>  | <b>0.000</b> | <b>0.000</b>       | 1.276                 | 1.079        | 1.509        | 0.004        | 0.008              | <b>0.244</b>           | <b>0.140</b> | <b>0.426</b> | <b>0.000</b> | <b>0.000</b>       | <b>0.463</b>         | <b>0.380</b> | <b>0.564</b> | <b>0.000</b> | <b>0.000</b>       |
|                                  | $\beta$ NGF     | <b>4.686</b>            | <b>2.504</b> | <b>8.770</b>  | <b>0.000</b> | <b>0.000</b>       | 1.107                 | 0.913        | 1.341        | 0.301        | 0.354              | <b>1.998</b>           | <b>1.202</b> | <b>3.321</b> | <b>0.008</b> | <b>0.021</b>       | 1.302                | 1.107        | 1.530        | 0.001        | 0.004              |
|                                  | EGF             | <b>3.186</b>            | <b>2.017</b> | <b>5.035</b>  | <b>0.000</b> | <b>0.000</b>       | 1.376                 | 1.174        | 1.613        | 0.000        | 0.000              | 1.055                  | 0.719        | 1.548        | 0.786        | 0.876              | 1.102                | 0.987        | 1.230        | 0.083        | 0.134              |
|                                  | FGFb            | <b>3.637</b>            | <b>2.098</b> | <b>6.305</b>  | <b>0.000</b> | <b>0.000</b>       | 1.266                 | 1.071        | 1.497        | 0.006        | 0.009              | <b>2.774</b>           | <b>1.662</b> | <b>4.629</b> | <b>0.000</b> | <b>0.001</b>       | <b>1.521</b>         | <b>1.281</b> | <b>1.807</b> | <b>0.000</b> | <b>0.000</b>       |
|                                  | HGF             | 0.754                   | 0.492        | 1.154         | 0.194        | 0.215              | <b>0.656</b>          | <b>0.549</b> | <b>0.785</b> | <b>0.000</b> | <b>0.000</b>       | 1.047                  | 0.633        | 1.732        | 0.857        | 0.902              | 0.993                | 0.838        | 1.178        | 0.940</      |                    |
